# Supplementary material for: A MoSe2/N-doped hollow carbon sphere host for rechargeable Na–Se batteries
Source: Royal Society of Chemistry journal article supplement (doi:10.1039/d1dt00401h), 2021-01-01
Supplement: d1dt00401h1.pdf [file d1dt00401h1.pdf]

## Supplementary Information

### **MoSe<sub>2</sub>/N-Doped Hollow Carbon Spheres Host for Rechargeable Na-Se batteries**

Fengping Xiao<sup>‡a,b</sup>, Peng Hu<sup>‡a,b\*</sup>, Yanni Wu<sup>a,d</sup>, Qing Tang<sup>a</sup>, Nilesh Shinde<sup>b</sup>, Yulong Liu<sup>c</sup>

<sup>a</sup> *School of Environment and Chemical Engineering, Zhaoqing University, Zhaoqing, Guangdong 526061, P. R. China*

<sup>b</sup> *Department of Chemistry, The University of Western Ontario, London, Ontario N6A 5B7, Canada*

<sup>c</sup> *Department of Chemistry, Northeast Normal University, 5268 Renming Street, Changchun, China*

<sup>d</sup> *Guangdong Provincial Key Laboratory of Environmental Health and Land Resource, Zhaoqing University, Zhaoqing, Guangdong 526061, P. R. China*

Table S1. Summary comparison of cyclic performances of Na-Se batteries, the specific capacity was calculated based on Se content.

| Material                                                     | Current density [mA g <sup>-1</sup> ] | Cyclability [mAh g <sub>Se</sub> <sup>-1</sup> ] (after cycles) | Selenium content [wt%] | Year/Ref         |
|--------------------------------------------------------------|---------------------------------------|-----------------------------------------------------------------|------------------------|------------------|
| <b>N-doped porous carbon hollow spheres@MoSe<sub>2</sub></b> | <b>1000</b>                           | <b>493 (1000)</b>                                               | <b>72</b>              | <b>This work</b> |
| Se@hollow mesoporous carbon sphere                           | 500                                   | 291 (1500)                                                      | 56                     | 2020/[1]         |
| N, S-co-doped hierarchically porous carbon microspheres/Se   | 338                                   | 445 (400)                                                       | 59                     | 2020/[2]         |
| Jackfruit-like Se-carbon                                     | 1350                                  | 392 (600)                                                       | 53                     | 2019/[3]         |
| Se/S, O co-doped hierarchical porous carbon                  | 338                                   | 265 (600)                                                       | 50                     | 2019/[4]         |
| Se@N-doped interconnected carbon aerogels                    | 500                                   | 407 (800)                                                       | 52                     | 2019/[5]         |
| Se impregnated carbonized leaf                               | 2000                                  | 300 (500)                                                       | 47                     | 2019/[6]         |
| PANI@N, S dual-doped hierarchical porous carbon/Se           | 1350                                  | 480 (1000)                                                      | 57                     | 2019/[7]         |
| Se@microporous carbon nanofibers                             | 500                                   | 430 (300)                                                       | 48                     | 2018/[8]         |
| Se-hierarchical porous carbon                                | 1350                                  | 243 (1000)                                                      | 56                     | 2018/[9]         |
| Se/N-doped microporous carbon polyhedrons                    | 1000                                  | 460 (500)                                                       | 49                     | 2018/[10]        |
| Se@N-doped hierarchically radial-structured carbon           | 338                                   | ~ 400 (500)                                                     | 62                     | 2018/[11]        |

|                                                                                |      |             |    |           |
|--------------------------------------------------------------------------------|------|-------------|----|-----------|
| Se/N, O dual-doped hierarchical porous carbon                                  | 338  | 402 (500)   | 48 | 2018/[12] |
| Al <sub>2</sub> O <sub>3</sub> coated (Se/porous N-doped carbon nanofibers)@Se | 500  | 503 (1000)  | 67 | 2018/[13] |
| Se-monolithic carbon                                                           | 135  | ~ 400 (150) | 70 | 2018/[14] |
| Carbon nanofiber/Se                                                            | 67.5 | 374 (94)    | 72 | 2018/[15] |
| Se@N, O dual-doped porous carbon sheet-CNT film                                | 1000 | 400 (2000)  | 60 | 2018/[16] |
| Se/N-doped porous carbon polyhedrons                                           | 1350 | 161 (1000)  | 49 | 2017/[17] |
| Se-carbon nanosheet                                                            | 135  | 514 (500)   | 53 | 2017/[18] |
| Se@mesoporous carbon nanofibers                                                | 50   | 520 (80)    | 52 | 2015/[19] |
| Se@carbon nanofiber-CNT                                                        | 500  | 410 (240)   | 35 | 2015/[20] |
| <i>in-situ</i> formed C/Se composite                                           | 100  | 280(50)     | 54 | 2015/[21] |
| Se@mesoporous carbon composite                                                 | 67.5 | 340 (380)   | 30 | 2013/[22] |

---

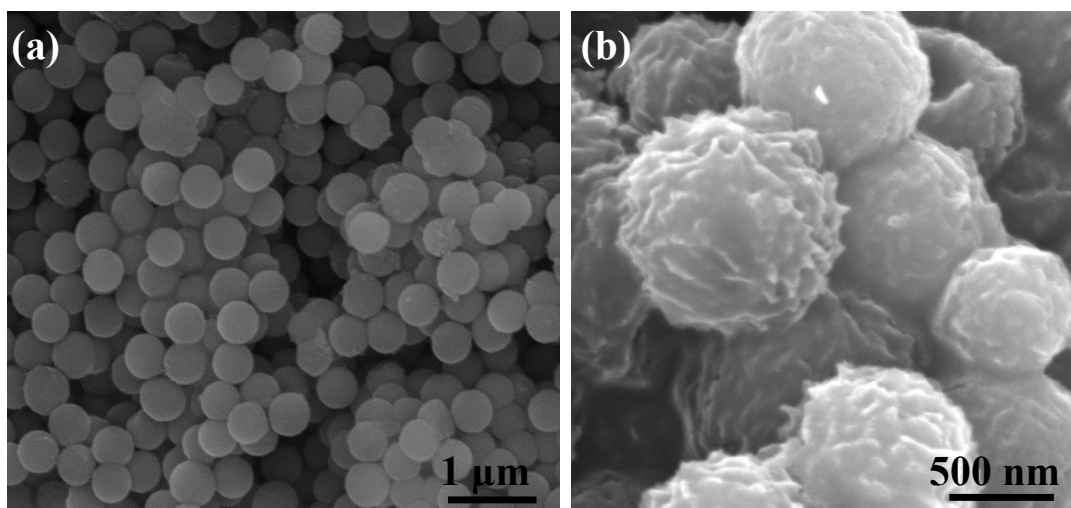

**Figure S1.** SEM image of (a)  $\text{SiO}_2$  spheres and (b)  $\text{SiO}_2@MoSe_2/N$ -doped carbon composite.

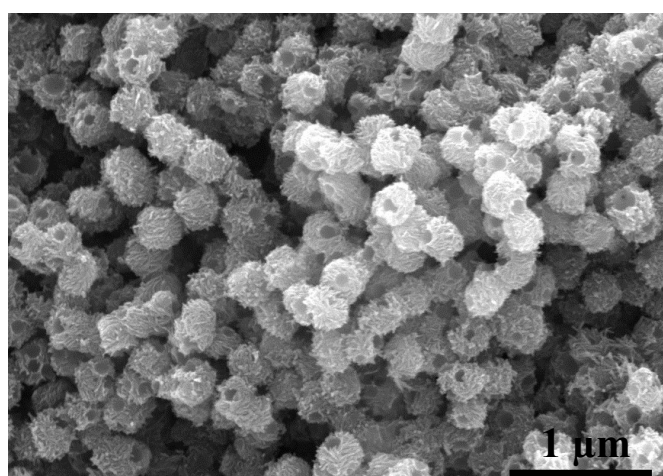

**Figure S2.** SEM image of the NCHS@ $MoSe_2$  host.

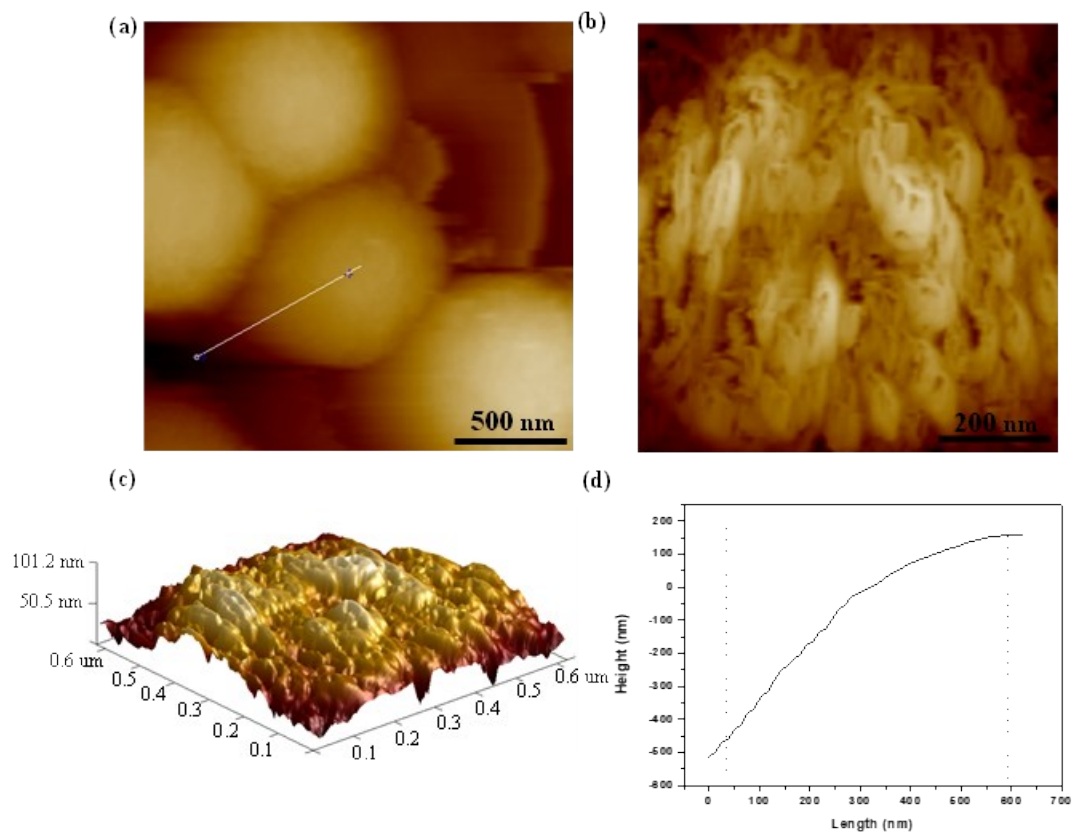

**Figure S3.** Tapping-mode AFM images of the topography of NCHS@MoSe<sub>2</sub> under (a) low and (b) high resolutions, (c) the corresponding 3D view, and (d) the corresponding line scan.

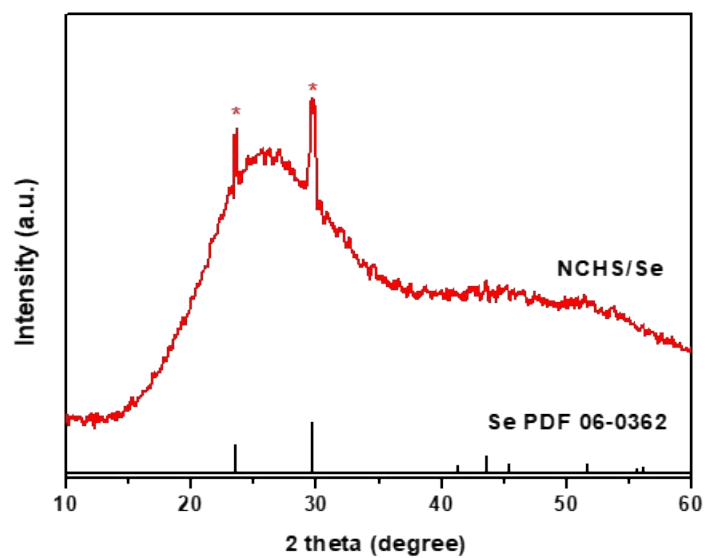

**Figure S4.** XRD pattern of the NCHS/Se composite (Se peaks are marked with red asterisks).

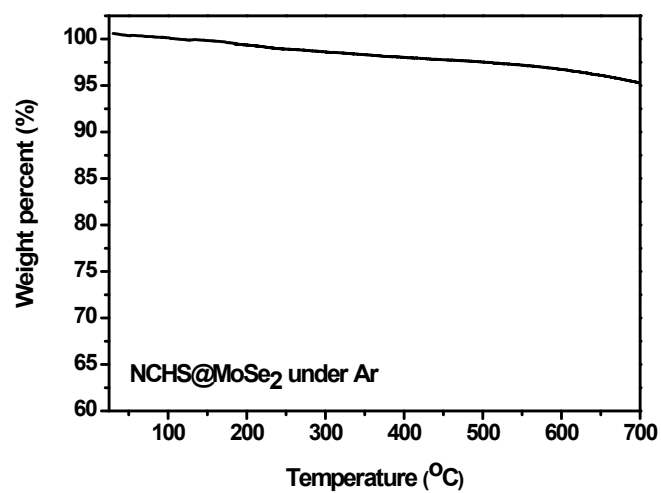

**Figure S5.** TGA curve of the NCHS@MoSe<sub>2</sub> composite under Ar.

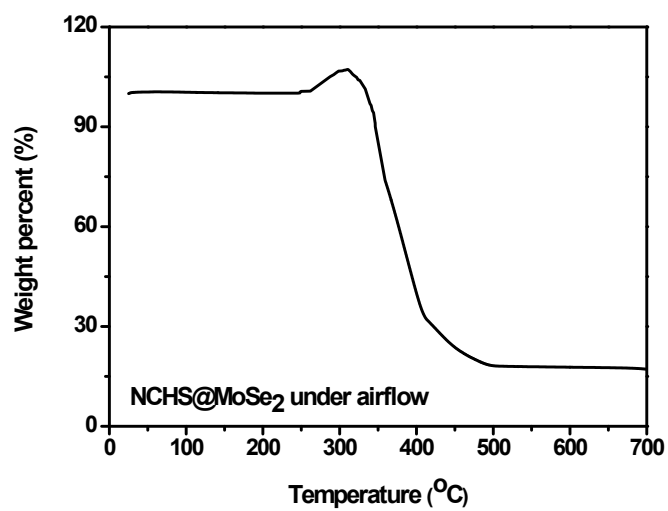

**Figure S6.** TGA curve of NCHS@MoSe<sub>2</sub> composite under airflow.

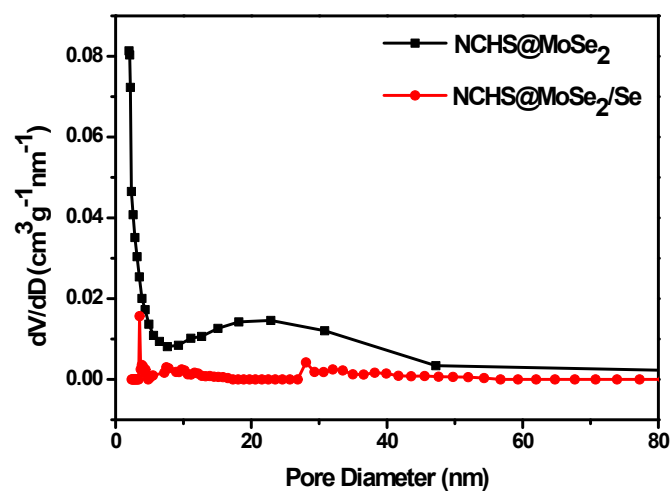

**Figure S7.** The pore size distribution of NCHS@MoSe<sub>2</sub> and NCHS@MoSe<sub>2</sub>/Se composites.

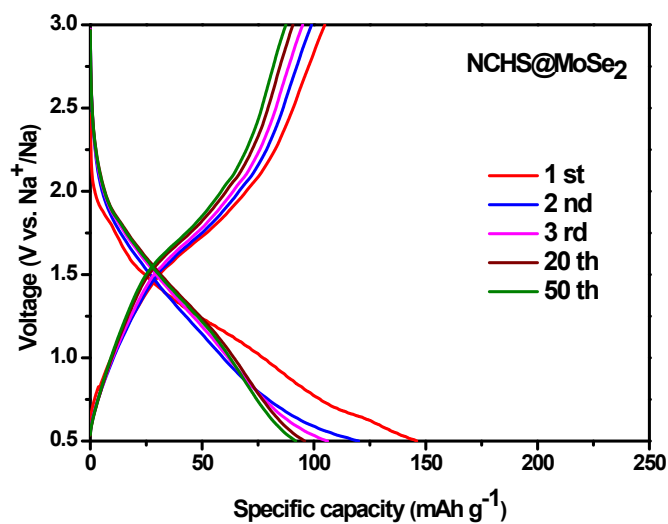

**Figure S8.** The cycle performance of NCHS@MoSe<sub>2</sub> electrode at 0.1 A g<sup>-1</sup>.

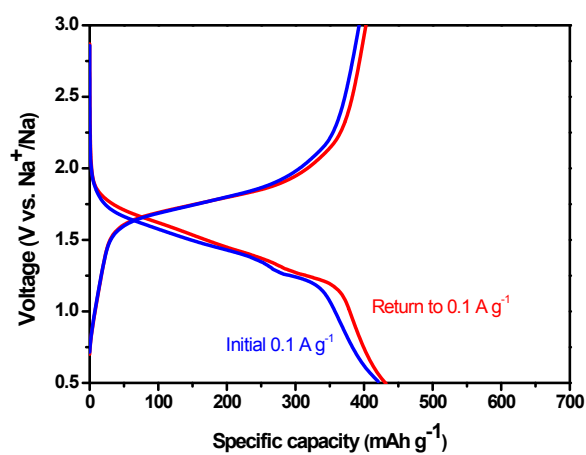

**Figure S9.** Selected charge/discharge profiles of NCHS@MoSe<sub>2</sub>/Se cathode at the initial and return to 0.1 A g<sup>-1</sup>.

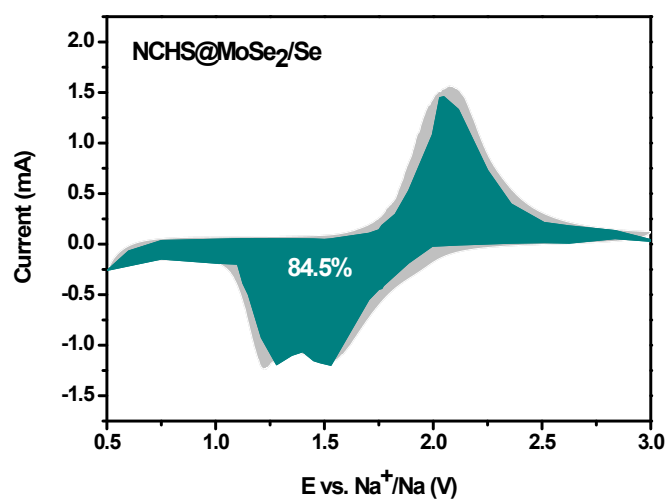

**Figure S10.** The illustration of the pseudocapacitive fraction at 1.0 mVs<sup>-1</sup>.

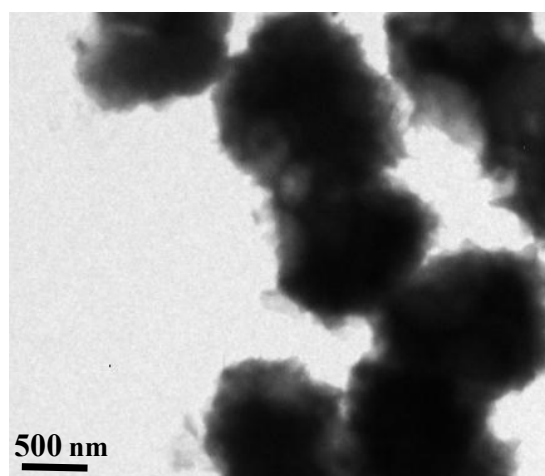

**Figure S11.** TEM image of NCHS@MoSe<sub>2</sub>/Se cathode after 100 cycles.



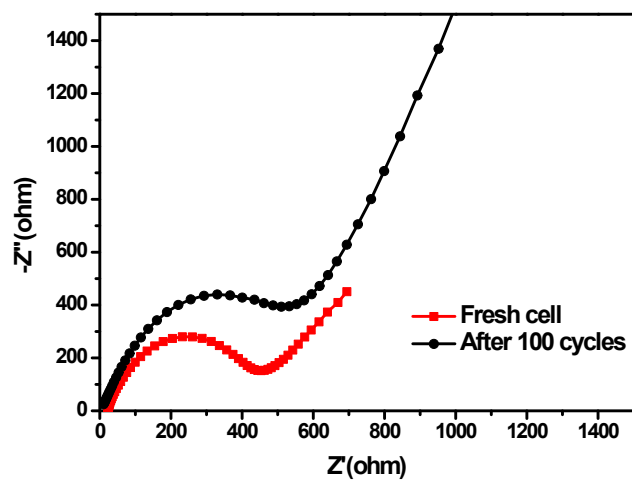

**Figure S12.** EIS characterization of NCHS@MoSe<sub>2</sub>/Se before and after 100 cycles.

## References

- [1] Xue, P.; Zhai, Y.; Wang, N.; Zhang, Y.; Lu, Z.; Liu, Y.; Bai, Z.; Han, B.; Zou, G.; Dou, S. Selenium@Hollow Mesoporous Carbon Composites for High-Rate and Long-Cycling Lithium/Sodium-Ion Batteries. *Chem. Eng. J.* **2020**, *392*, 123676.
- [2] Kim J. K. Kang Y. C. Encapsulation of Se into Hierarchically Porous Carbon Microspheres with Optimized Pore Structure for Advanced Na–Se and K–Se Batteries. *ACS Nano* **2020**, *14*, 13203–13216
- [3] Xu, Q.; Yang, T.; Gao, W.; Zhan, R.; Zhang, Y.; Bao, S.; Li, X.; Chen, Y.; Xu, M. Jackfruit-Like Electrode Design for Advanced Na-Se Batteries. *J. Power Sources* **2019**, *443*, 227245.
- [4] Zhao, X.; Yin, L.; Yang, Z.; Chen, G.; Yue, H.; Zhang, D.; Sun, Z.; Li, F. An Alkali Metal-Selenium Battery with a Wide Temperature Range and Low Self-Discharge. *J. Mater. Chem. A* **2019**, *7*, 21774-21782.
- [5] Deng, Y.; Gong, L.; Pan, Y.; Cheng, X.; Zhang, H. A Long-Life Sodium–Selenium Cathode by Encapsulating Selenium into N-Doped Interconnected Carbon Aerogels. *Nanoscale* **2019**, *11*, 11671-11678.
- [6] Guo, B.; Mi, H.; Zhang, P.; Ren, X.; Li, Y. Free-Standing Selenium Impregnated Carbonized Leaf Cathodes for High-Performance Sodium-Selenium Batteries. *Nanoscale Res. Lett.* **2019**, *14*, 30.
- [7] Zhang, F.; Xiong, P.; Guo, X.; Zhang, J.; Yang, W.; Wu, W.; Liu, H.; Wang, G. A Nitrogen, Sulphur Dual-Doped Hierarchical Porous Carbon with Interconnected Conductive Polyaniline Coating for High-Performance Sodium-Selenium Batteries. *Energy Storage Mater.* **2019**, *19*, 251-260.
- [8] Yuan, B.; Sun, X.; Zeng, L.; Yu, Y.; Wang, Q. A Freestanding and Long-Life Sodium-Selenium Cathode by Encapsulation of Selenium into Microporous Multichannel Carbon Nanofibers. *Small* **2018**, *14*, 1703252.
- [9] Xu, Q.; Liu, H.; Du, W.; Zhan, R.; Hu, L.; Bao, S.; Dai, C.; Liu, F.; Xu, M. Metal-Organic Complex Derived Hierarchical Porous Carbon as Host Matrix for Rechargeable Na- Se Batteries. *Electrochim. Acta* **2018**, *276*, 21-27.
- [10] Li, S.; Yang, H.; Xu, R.; Jiang, Y.; Gong, Y.; Gu, L.; Yu, Y. Selenium Embedded in MOF-Derived N-Doped Microporous Carbon Polyhedrons as a High Performance Cathode for Sodium-Selenium Batteries. *Mater. Chem. Front.* **2018**, *2*, 1574-1582.
- [11] Dong, W.; Chen, H.; Xia, F.; Yu, W.; Song, J.; Wu, S.; Deng, Z.; Hu, Z.-Y.; Hasan, T.; Li, Y.; Wang, H.; Chen, L.; Su, B.-L. Selenium Clusters in Zn-Glutamate MOF Derived Nitrogen-Doped Hierarchically Radial-Structured Microporous Carbon for Advanced Rechargeable Na-Se Batteries. *J. Mater. Chem. A* **2018**, *6*, 22790-22797.
- [12] Zhao, X.; Yin, L.; Zhang, T.; Zhang, M.; Fang, Z.; Wang, C.; Wei, Y.; Chen, G.; Zhang, D.; Sun, Z.; Li, F. Heteroatoms Dual-Doped Hierarchical Porous Carbon-Selenium Composite for Durable Li-Se and Na-Se Batteries. *Nano Energy* **2018**, *49*, 137-146.
- [13] Ma, D.; Li, Y.; Yang, J.; Mi, H.; Luo, S.; Deng, L.; Yan, C.; Zhang, P.; Lin, Z.; Ren, X.; Li, J.; Zhang, H. Atomic Layer Deposition-Enabled Ultrastable Freestanding Carbon- Selenium Cathodes with High Mass Loading for Sodium-Selenium Battery.

*Nano Energy* **2018**, *43*, 317-325.

[14] Ding, J.; Zhou, H.; Zhang, H.; Tong, L.; Mitlin, D. Selenium Impregnated Monolithic Carbons as Free-Standing Cathodes for High Volumetric Energy Lithium and Sodium Metal Batteries. *Adv. Energy Mater.* **2018**, *8*, 1701918.

[15] Wang, H.; Jiang, Y.; Manthiram, A. Long Cycle Life, Low Self-Discharge Sodium- Selenium Batteries with High Selenium Loading and Suppressed Polyselenide Shuttling. *Adv. Energy Mater.* **2018**, *8*, 1701953.

[16] Yao, Y.; Chen, M.; Xu, R.; Zeng, S.; Yang, H.; Ye, S.; Liu, F.; Wu, X.; Yu, Y. CNT Interwoven Nitrogen and Oxygen Dual-Doped Porous Carbon Nanosheets as Free-Standing Electrodes for High-Performance Na-Se and K-Se Flexible Batteries. *Adv. Mater.* **2018**, *30*, 1805234.

[17] Xu, Q.; Liu, T.; Li, Y.; Hu, L.; Dai, C.; Zhang, Y.; Li, Y.; Liu, D.; Xu, M. Selenium Encapsulated into Metal-Organic Frameworks Derived N-Doped Porous Carbon Polyhedrons as Cathode for Na-Se Batteries. *ACS Appl. Mater. Interfaces* **2017**, *9*, 41339-41346.

[18] Ding, J.; Zhou, H.; Zhang, H.; Stephenson, T.; Li, Z.; Karpuzov, D.; Mitlin, D. Exceptional Energy and New Insight with a Sodium-Selenium Battery Based on a Carbon Nanosheet Cathode and a Pseudographite Anode. *Energy Environ. Sci.* **2017**, *10*, 153-165.

[19] Zeng, L.; Zeng, W.; Jiang, Y.; Wei, X.; Li, W.; Yang, C.; Zhu, Y.; Yu, Y. A Flexible Porous Carbon Nanofibers-Selenium Cathode with Superior Electrochemical Performance for Both Li-Se and Na-Se Batteries. *Adv. Energy Mater.* **2015**, *5*, 1401377.

[20] Zeng, L.; Wei, X.; Wang, J.; Jiang, Y.; Li, W.; Yu, Y. Flexible One-Dimensional Carbon-Selenium Composite Nanofibers with Superior Electrochemical Performance for Li- Se/Na-Se Batteries. *J. Power Sources* **2015**, *281*, 461-469.

[21] Luo, C.; Wang, J.; Suo, L.; Mao, J.; Fan, X.; Wang, C. *in Situ* Formed Carbon Bonded and Encapsulated Selenium Composites for Li-Se and Na-Se Batteries. *J. Mater. Chem. A* **2015**, *3*, 555-561.

[22] Luo, C.; Xu, Y.; Zhu, Y.; Liu, Y.; Zheng, S.; Liu, Y.; Langrock, A.; Wang, C. Selenium@Mesoporous Carbon Composite with Superior Lithium and Sodium Storage Capacity. *ACS Nano* **2013**, *7*, 8003-801
